# Supplementary material for: Localized Heat Induces ERK Signaling and Intercellular Communication in Solid Tumors
Source: Research Square preprint supplement (doi:10.21203/rs.3.rs-8591005/v1), 2026-02-04
Supplement: Supplementary file 1 [file 618d46253f958ab212d5c4a9.docx]

**Supporting information**

**Localized Heat Induces ERK Signaling and Intercellular Communication in Solid Tumors**

Farsai Taemaitreea,b,c,‡, Yuta Takanoa,d,‡,*, Daisuke Yamaguchib, Kazushi Yamaguchib, Yudai Yamashitab, Motosuke Tsutsumie,f, Chentao Weng,h, Kohei Otomoe,f,i, Kenji Hiraia,b, James Hutchisonj, Indra Van Zundertk, Sandra Krzyzowskak, Maria Bravok,j, Sayuki Hiranom, Koutarou D Kimurag, Kazuhiro Aokie,l,m, Susana Rochak, Tomomi Nemotoe,f*, Beatrice Fortunik* and Hiroshi Uji-ia,b,k,n*

1. *Research Institute for Electronic Science, Hokkaido University, N20, W10, Sapporo 001-0020, Japan.*
2. *Graduate School of Information Science and Technology, Hokkaido University, N14, W9, Sapporo 060-0813, Japan.*
3. *Institute of Multidisciplinary Research for Advanced Materials (IMRAM), Tohoku University, 2–1–1 Katahira, Aoba–Ward, Sendai, 980–8577 Japan*
4. *Graduate School of Environmental Science, Hokkaido University, N10, W5, Sapporo 060-0814, Japan.*
5. *Exploratory Research Center on Life and Living Systems, National Institute of Natural Sciences, Higashiyama 5-1, Myodaiji, Okazaki, Aichi 444-8787, Japan*
6. *National Institute for Physiological Sciences, National Institutes of Natural Sciences, Higashiyama 5-1, Myodaiji, Okazaki, Aichi 444-8787, Japan.*
7. *Graduate School of Science, Nagoya City University, Nagoya 467-8501, Japan*
8. *RIKEN Center for Biosystems Dynamics Research, Kobe 650-0047, Japan.*
9. *Graduate School of Medicine, Juntendo University, 2-1-1 Hongo, Tokyo 113-8421, Japan*
10. *ARC Centre of Excellence in Exciton Science, School of Chemistry, University of Melbourne, Parkville, VIC 3010, Australia*
11. *Molecular Imaging and Photonics, Department of Chemistry, KU Leuven, Celestijnenlaan 200F, Heverlee 3001, Belgium*
12. *National Institute for Basic Biology, National Institutes of Natural Sciences, Okazaki, Aichi 444-8585, Japan.*
13. *Graduate School of Biostudies, Kyoto University, Sakyo-ku, Kyoto 606-8315, Japan.*
14. *Institute for Integrated Cell-Material Science (WPI-iCeMS), Kyoto University, Yoshida, Sakyo-ku, Kyoto 606-8501, Japan.*


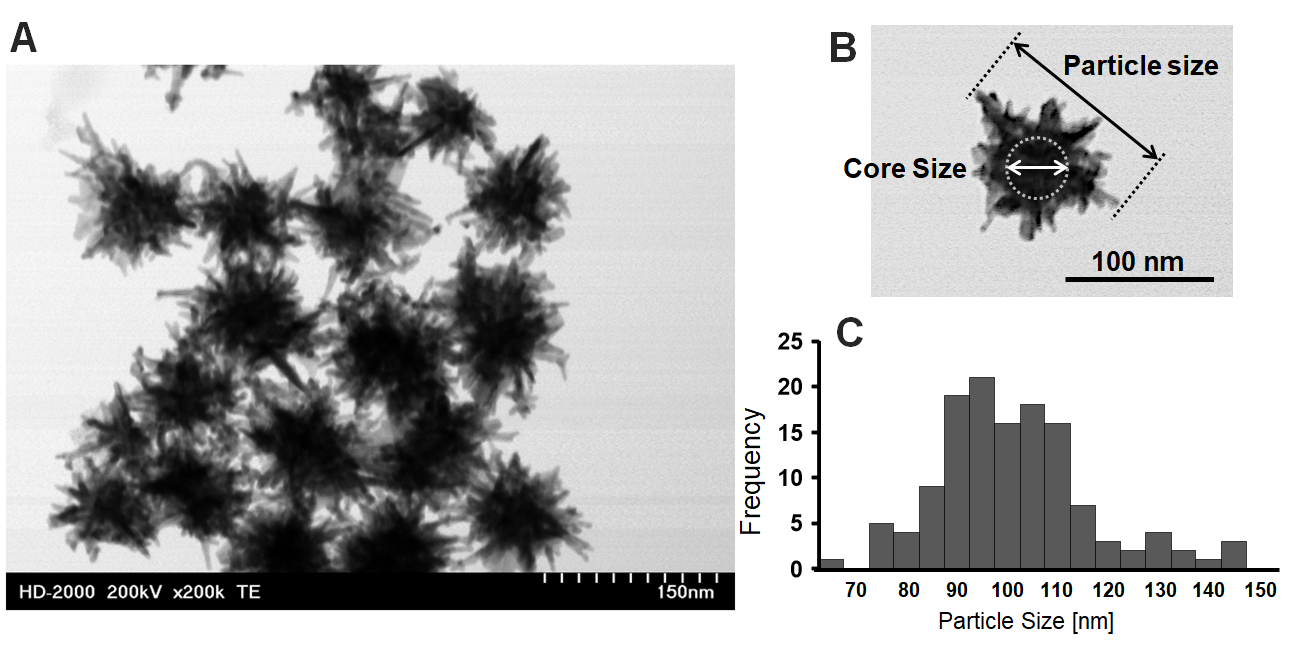


**Figure S1**. (A) STEM image of AuNS-Cys. (B) Schematic representation of the diameter calculation for the core and the particle: the particle diameter was estimated as the maximum Euclidean distance value between any two points on the AuNS-Cys perimeter. The particle core diameter was obtained from the darkest area from the shading of the STEM image. (C) Particle size distribution profile extracted from STEM images: mean particle diameter ± standard deviation was 101.3 ± 15.0 nm (n = 131) and the mean core diameter ± standard deviation was 37.8 ± 6.5 nm (n = 131).

Photothermal conversion efficiency (PCE)

The photo-thermal conversion (η) was determined according to the previously described method30;

where h is the heat transfer coefficient, S is the surface area of the container, and *hS* is determined from Equation (2). TMax is the maximum temperature achieved by illumination, and *T*Surr is the temperature of the surroundings. *Q*Dis represents the heat dissipated from the laser, mediated by the solvent and container. *I* corresponds to the intensity of the power source (700 nm laser at 0.030 W), and A700 represents the absorbance of the sample solution at 700 nm.

mD and *C*D are the mass and heat capacity of deionized water, respectively, and τs is the sample system time constant, which is determined according to Equation (3) and the slope shown in Figure. S7.

θ is a dimensionless parameter, known as the driving force temperature, as calculated using equation (4)


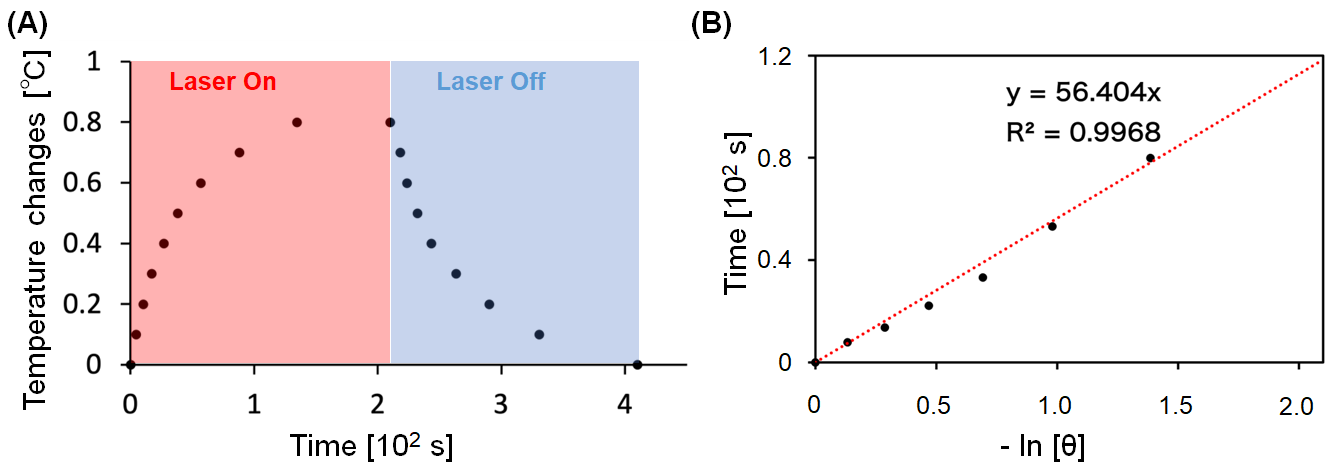


**Figure S2**. (A) Heating-cooling experiment under 30 mW 700 nm CW laser irradiation to determine the photothermal conversion efficiency (PCE). The laser was switched off after the sample reached a steady-state temperature of 220 s. (B) Linear fitting for the time and -ln θ plot. Linear time data versus -ln θ obtained from the cooling period in panel (A).


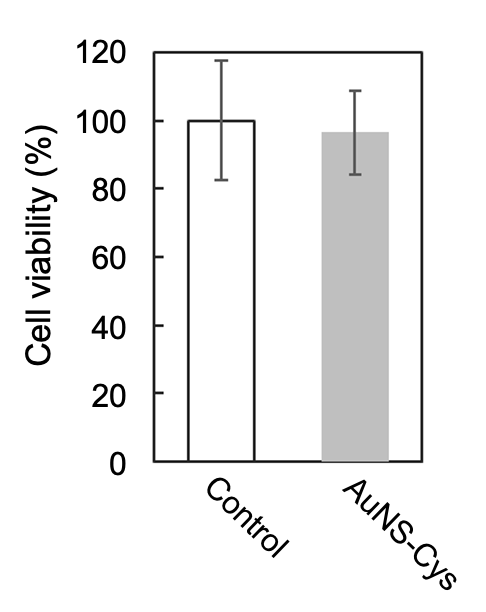


**Figure S3**. Dark cytotoxicity assay showing the viability of #T-HeLa cells with or without treatment with AuNS-Cys after 48 h incubation at 37oC.


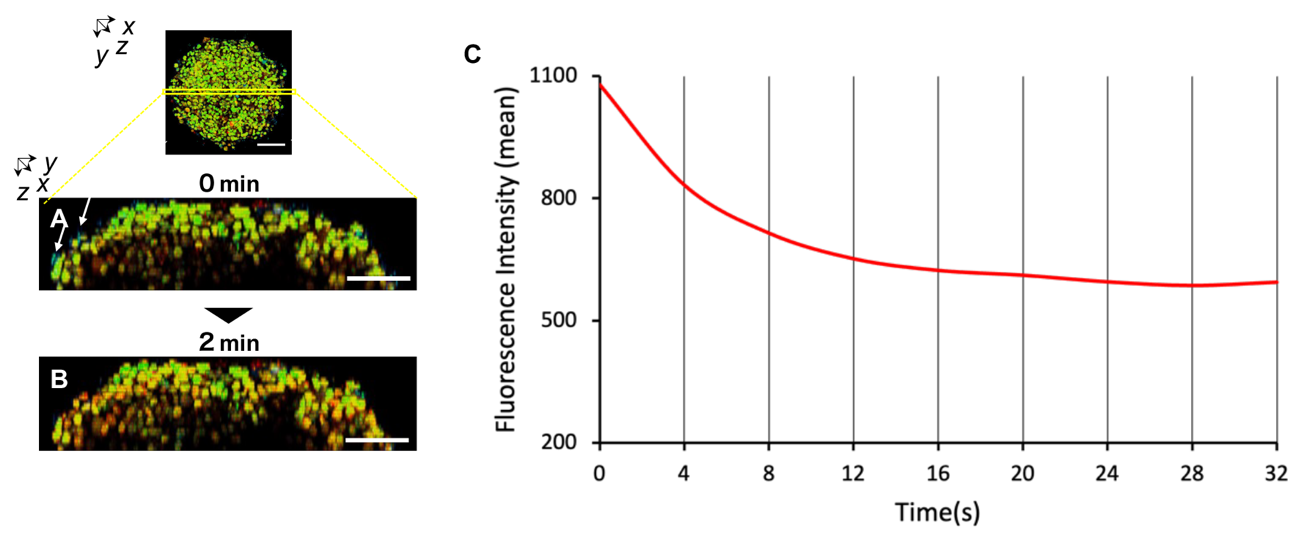


**Figure S4**. Maximum intensity z-projection (y-z) of the spheroids corresponding to Figure 2I-J (A and B, respectively), with the white arrows indicating the PL of AuNS-Cys. Photoluminescence intensity of AuNS-Cys over time upon irradiation with an 850 nm fs-pulsed laser, 22 mW mm-2 (B).


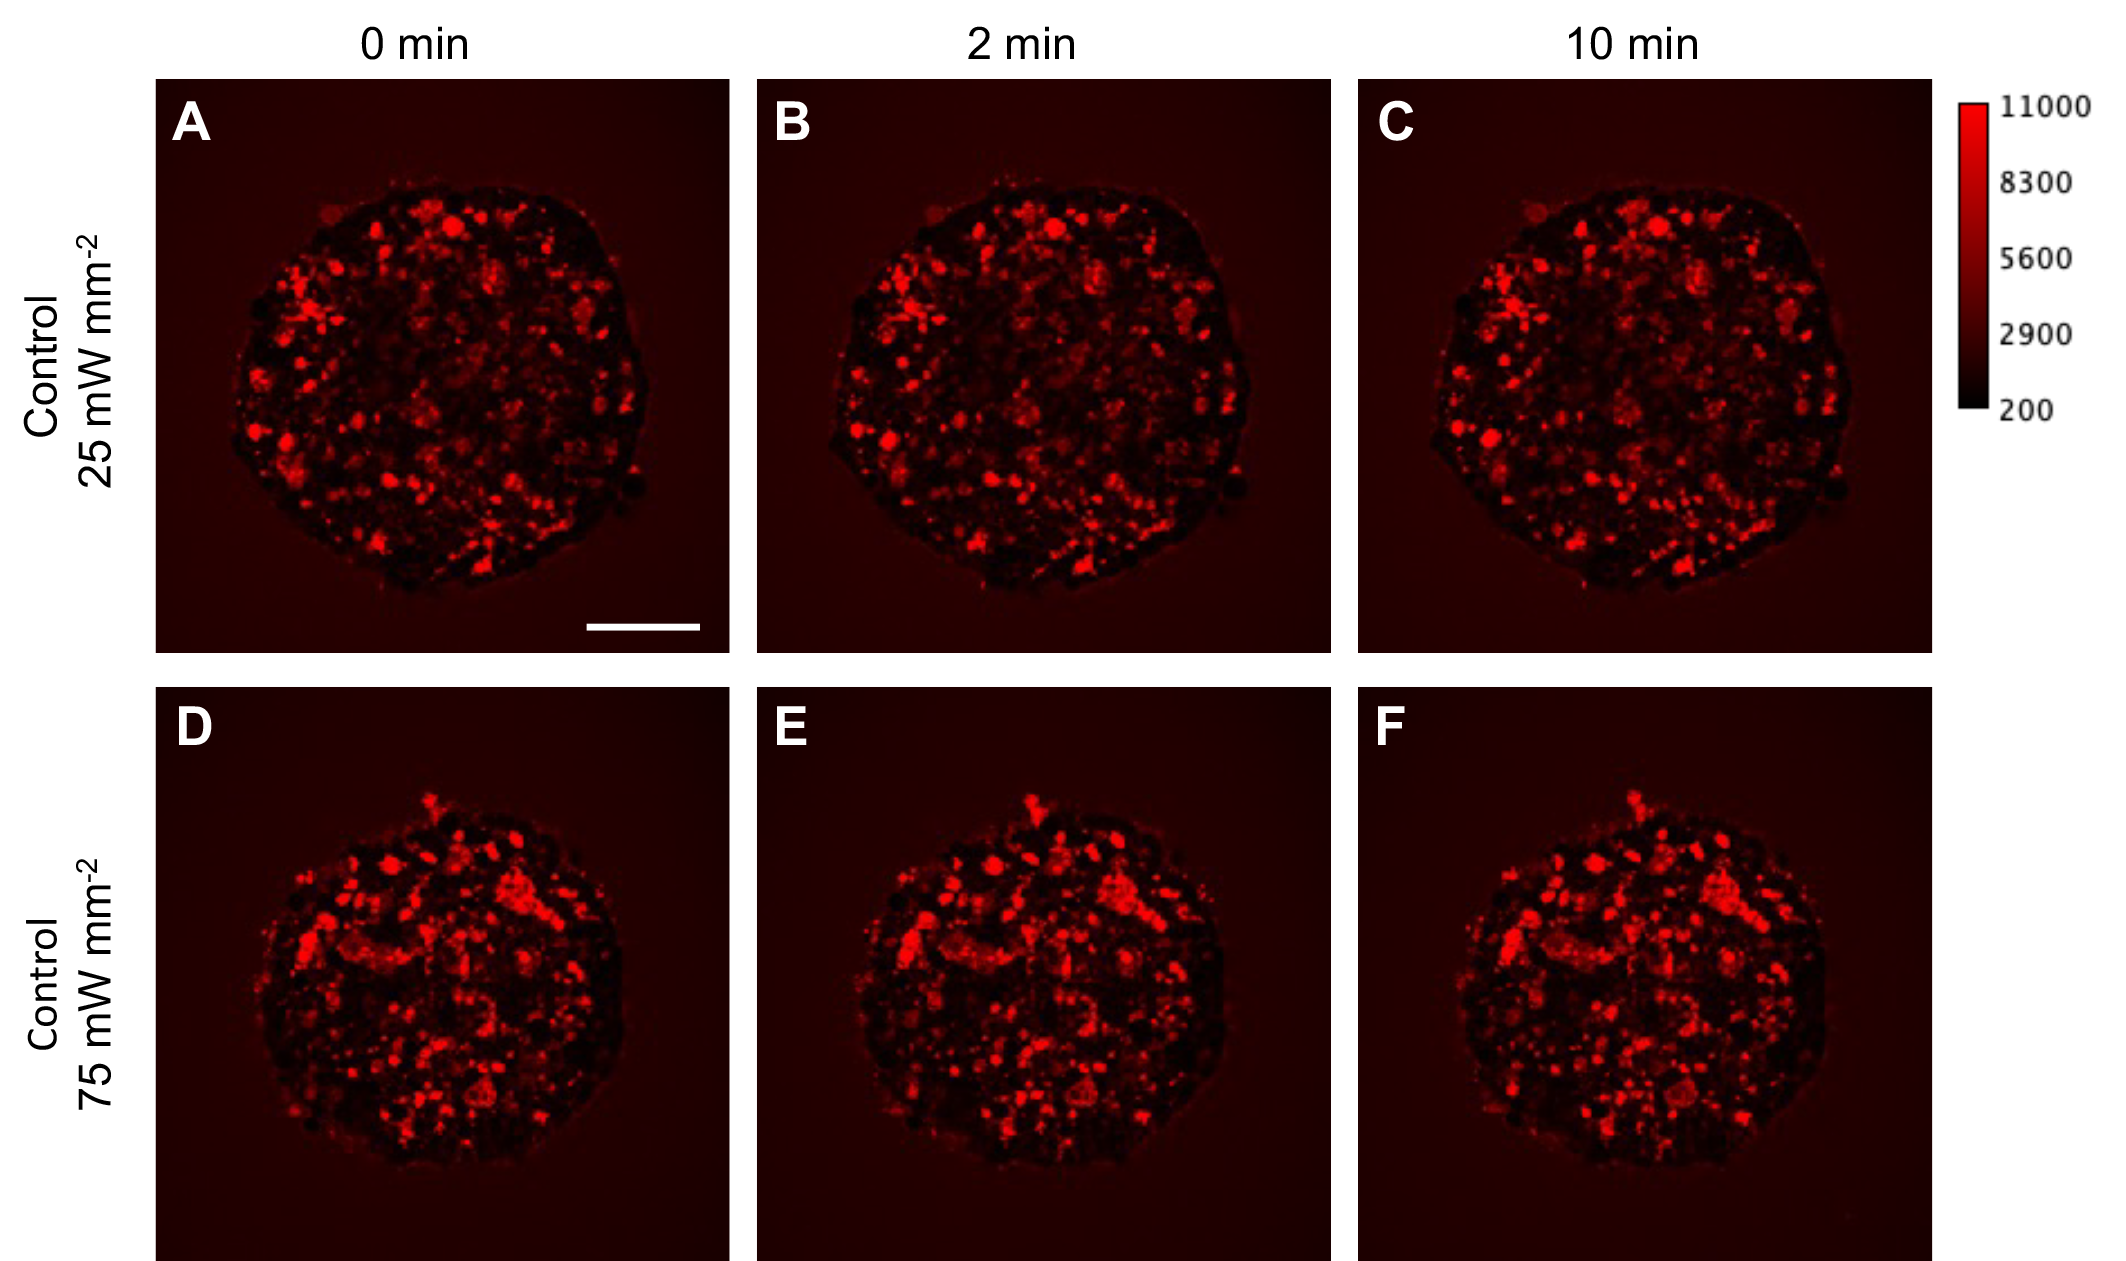


**Figure S5**. Untreated spheroid cell death assay using sulforhodamine B (SRB) staining. Confocal**xy**fluorescence images extracted from**z**-stacks of untreated**#T-Hela**spheroids (without**AuNS-Cys)** pre-irradiated for 3 s at**25 and 75 mW mm⁻²**, then imaged using **1.5 mW mm⁻²** at 0 min (first scan), 2 min, and 10 min **(A-C and D-F, respectively)**. Scale bar = 100 µm.


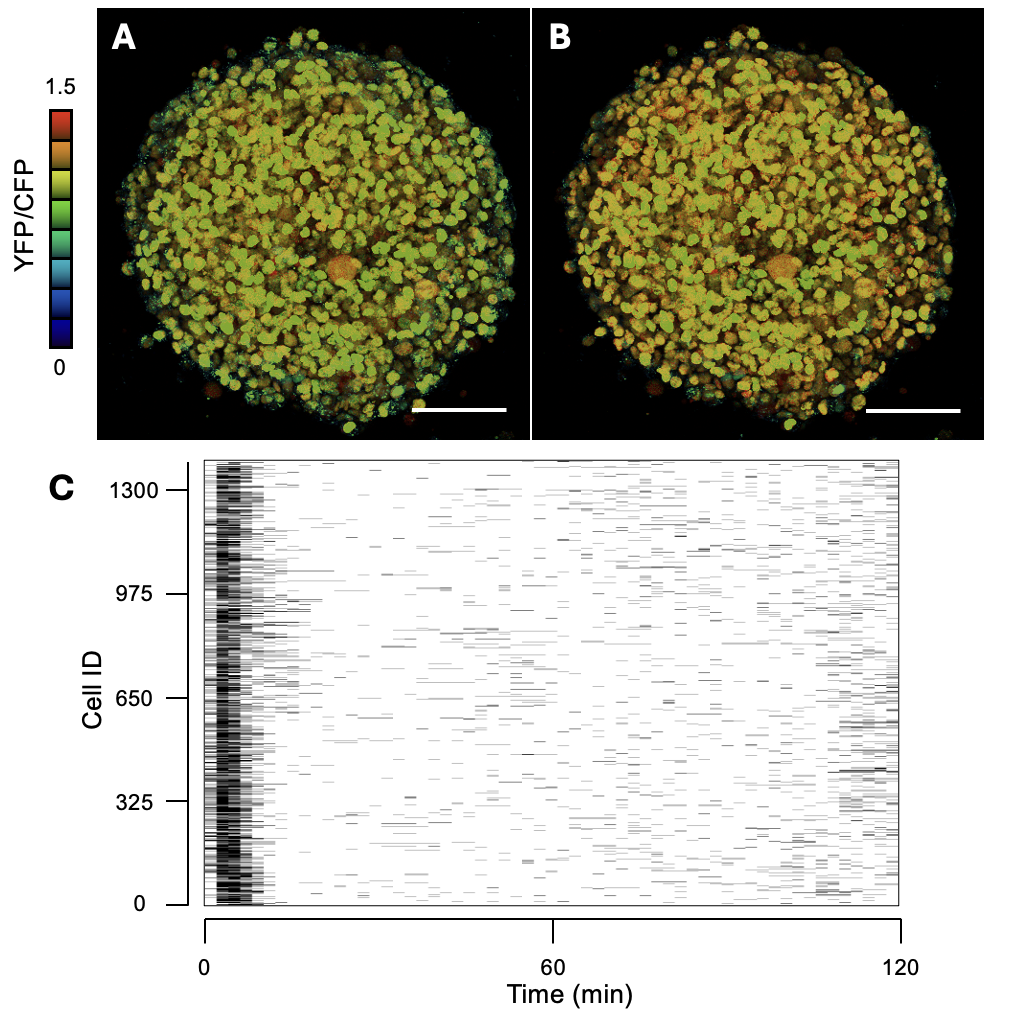


**Figure S6**. Ratiometric maximum intensity z-projections of #T-HeLa spheroids incubated with AuNS-Cys (two-photon excitation at 850 nm, 25 mW mm-2) at (A) 0 min and (B) 2 min. (C) Raster plots obtained from the 3DeeCellTracker analysis showing the timing of ERK activation in single cells as a function of time. The black horizontal lines indicate the ERK-activated state, determined by the FRET efficiency of YFP/CFP exceeding the mean of the control +2 SD, and the duration of each black line is 2 min. Scale bar = 100 µm.


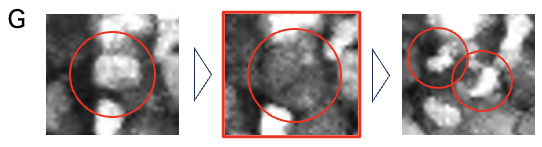

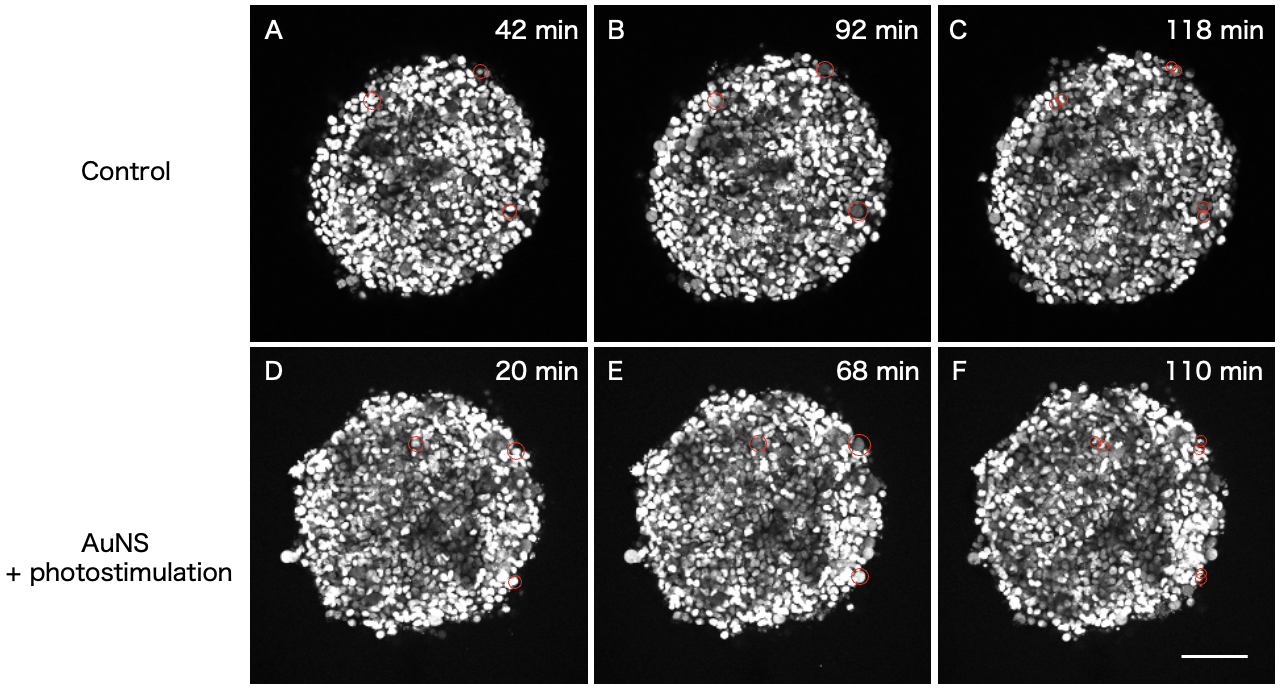


**Figure S7**. Maximum fluorescence intensity z-projection of #T-HeLa spheroids (control) (A-C) and of #T-HeLa spheroids incubated with AuNSs (D-F) scanned at 1.5 mW mm-2 (normal conditions). Red circles indicate points of cell division. The bottom insets show zoomed-in sections extracted from (D-F). Scale bar = 100 µm.
